# Supplementary material
Source: Springer Nature journal article supplement (https://www.springermedizin.de/resource/supplementary/12891_2011_1545_MOESM9_ESM.pdf/9507870)

D-study: number of repetitions and effect on generalizability coefficient anteflexion

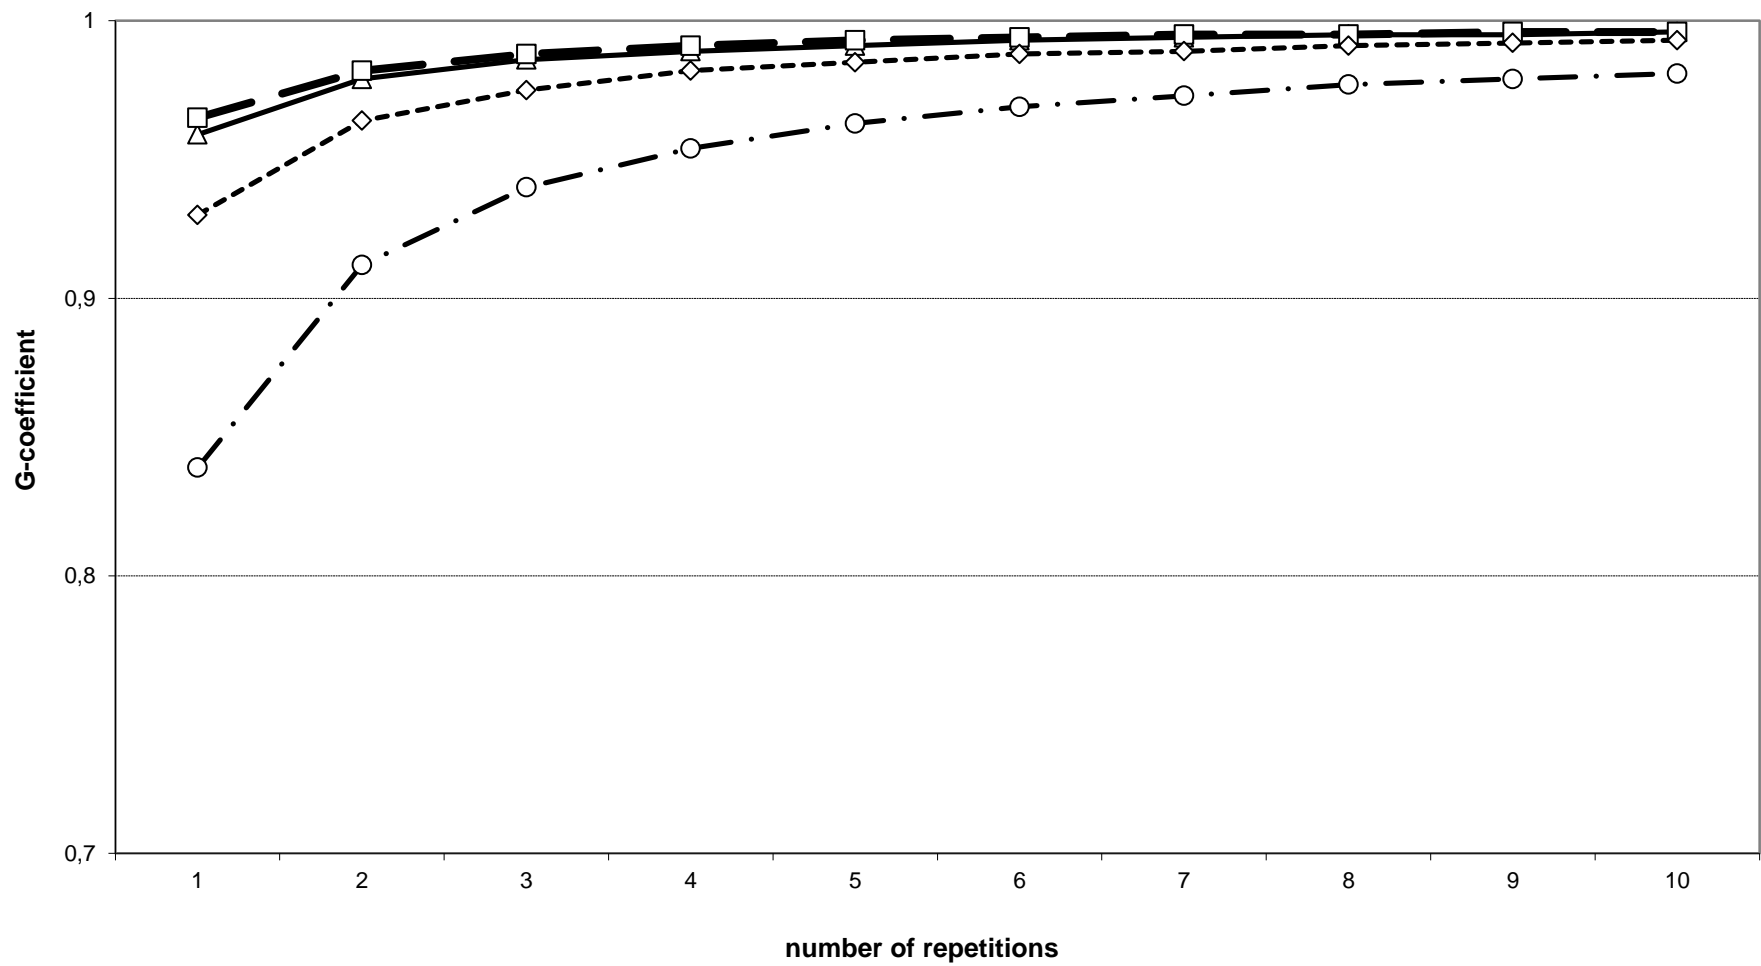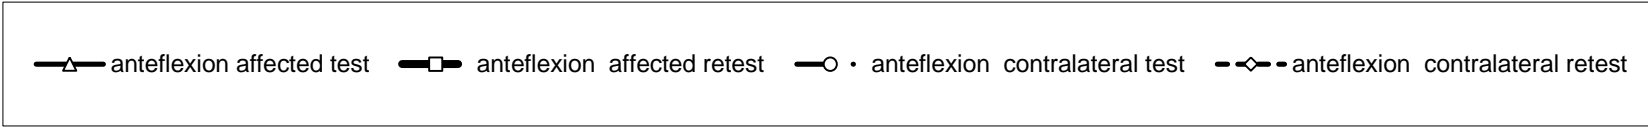

Supplement: MOESM9 [file 9507870]
